# Supplementary material
Source: ML conference proceedings conference paper supplement (https://openaccess.thecvf.com/content/cvpr_2016/html/Kong_Prior-Less_Compressible_Structure_2016_CVPR_paper.html)
Supplement: Supplementary file 1 [file Kong_Prior-Less_Compressible_Structure_2016_CVPR_supplemental.pdf]

# Prior-Less Compressible Structure from Motion: Supplementary Material

Chen Kong Simon Lucey  
Carnegie Mellon University  
5000 Forbes Ave, Pittsburgh, PA, US  
{chenk, slucey}@cs.cmu.edu

Recall the objective of Block Sparse Dictionary Learning (BSDL) is

$$\operatorname{argmin}_{\mathbf{D}, \mathbf{Z}} \|\mathbf{X} - \mathbf{D}\mathbf{Z}\|_F^2 \quad \text{s.t.} \|\mathbf{Z}_i\|_{0,\alpha} = K, \quad i = 1 : N/\beta, \quad (1)$$

where  $\mathbf{Z}_i \in \mathbb{R}^{D \times \beta}$  is a submatrix of  $\mathbf{Z}$ , i.e.  $\mathbf{Z} = [\mathbf{Z}_1, \dots, \mathbf{Z}_{N/\beta}]$ . Each  $\mathbf{Z}_i$  is divided into  $M/\alpha$  blocks of size  $\alpha \times \beta$  and  $\|\mathbf{Z}_i\|_{0,\alpha}$  counts the number of blocks of which at least one element is non-zero.  $\alpha$  and  $\beta$  need to be chosen such that  $D$  and  $M$  are perfectly divisible.

**Definition 1.** If any valid solution  $\{\hat{\mathbf{D}}, \hat{\mathbf{Z}}\}$  to the objective in Equation 1 is ambiguous only up to a  $M \times M$  block permutation matrix  $\mathbf{P}_\alpha$  and a block-diagonal invertible weighting matrix  $\mathbf{\Lambda}_\alpha$  such that  $\hat{\mathbf{D}} = \mathbf{D}\mathbf{P}_\alpha\mathbf{\Lambda}_\alpha$ , and  $\hat{\mathbf{Z}} = \mathbf{\Lambda}_\alpha^{-1}\mathbf{P}_\alpha^T\mathbf{Z}$ , we say  $\mathbf{X}$  has a unique BSDL.

The block permutation matrix is actually defined as  $\mathbf{P}_\alpha = \mathbf{P} \otimes \mathbf{I}_\alpha$  where  $\mathbf{P}$  is an arbitrary  $(M/\alpha) \times (M/\alpha)$  permutation matrix and  $\mathbf{I}_\alpha$  is a  $\alpha \times \alpha$  identity matrix. The block-diagonal invertible weighting matrix  $\mathbf{\Lambda}_\alpha$  has a  $\alpha \times \alpha$  block structure. We now ask the same question: what is the sufficient and necessary condition for the uniqueness of BSDL?

**Theorem 1.** There exist  $K \binom{M/\alpha}{K}^2$   $K$ -block-sparse vectors  $\mathbf{Z}_1, \dots, \mathbf{Z}_{N/\beta}$ , i.e.  $N = \beta K \binom{M/\alpha}{K}^2$ , such that the uniqueness of BSDL holds if and only if the matrix  $\mathbf{D}$  satisfies the block spark condition:

$$\begin{aligned} \mathbf{D}\mathbf{Z}_1 = \mathbf{D}\mathbf{Z}_2 \quad \text{for } K\text{-block-sparse } \mathbf{Z}_1, \mathbf{Z}_2 \in \mathbb{R}^{M \times \beta} \\ \Rightarrow \mathbf{Z}_1 = \mathbf{Z}_2. \end{aligned} \quad (2)$$

Let's first prove Theorem 1 in the case when  $\beta = 1$  and once it is proven, the general case  $\beta > 1$  is simple to handle: We can split sparse causes  $\mathbf{Z}^i$  into  $[\mathbf{z}_1^i, \dots, \mathbf{z}_\beta^i]$ , where  $\mathbf{z}_j^i \in \mathbb{R}^{D \times 1}$  and then  $\mathbf{D}\mathbf{Z}^i = \mathbf{D}[\mathbf{z}_1^i, \dots, \mathbf{z}_\beta^i] = \hat{\mathbf{D}}\hat{\mathbf{Z}}^i = \hat{\mathbf{D}}[\hat{\mathbf{z}}_1^i, \dots, \hat{\mathbf{z}}_\beta^i]$  is equivalent to  $\mathbf{D}\mathbf{z}_j^i = \hat{\mathbf{D}}\hat{\mathbf{z}}_j^i$ , which degenerates to the situation where  $\beta = 1$ .

**A simple case when  $K = 1$ :** To better understand Theorem 1 and prepare for the proof in full generality, let us start from a simple case when  $K = 1$ . Denote  $\mathbf{e}_i^L$  as a  $L$ -dimensional column vector that has one in its  $i$ -th coordinate and zeros elsewhere. For convenience, let  $L = M/\alpha$ . Now let us produce  $M$  block vectors

$$\mathbf{z}_j^i = (\mathbf{e}_i^L \otimes \mathbf{e}_j^\alpha), \quad i = 1, \dots, L, \quad j = 1, \dots, \alpha, \quad (3)$$

which denotes that its  $j$ -th coordinate in  $i$ -th block is one and zeros elsewhere, and  $L \binom{\alpha}{2}$  block vectors  $\mathbf{z}_{jk}^i = \mathbf{z}_{jk}^i + \mathbf{z}_{jk}^i$ , for any  $i$  and  $j \neq k$ .

Now we claim that the uniqueness of BSDL in this simple case can be achieved by these  $M + L \binom{\alpha}{2}$  block vectors, which is less than  $K \binom{M/\alpha}{K}^2$  assuming  $M \gg \alpha$ .

*Proof.* There exists a matrix  $\hat{\mathbf{D}}$  and 1-block-sparse vector  $\hat{\mathbf{z}}_j^i = (\mathbf{e}_{\pi(i,j)}^L \otimes \mathbf{I}_\alpha)\boldsymbol{\lambda}_{ij}$ , for some mapping  $\pi : \{1, \dots, L\} \times \{1, \dots, \alpha\} \rightarrow \{1, \dots, L\}$  and  $\boldsymbol{\lambda}_{ij} \in \mathbb{R}^\alpha$ , such that

$$\mathbf{D}\mathbf{z}_j^i = \mathbf{D}(\mathbf{e}_i^L \otimes \mathbf{e}_j^\alpha) = \hat{\mathbf{D}}\hat{\mathbf{z}}_j^i = \hat{\mathbf{D}}(\mathbf{e}_{\pi(i,j)}^L \otimes \mathbf{I}_\alpha)\boldsymbol{\lambda}_{ij}, \quad (4)$$

We claim that  $\pi(i, j)$  is only dependent on  $i$ , not  $j$ . From Equation 4, we know that for any  $j \neq k$ ,  $\mathbf{D}\mathbf{z}_{jk}^i = \mathbf{D}(\mathbf{z}_j^i + \mathbf{z}_k^i) = \mathbf{D}\mathbf{z}_j^i + \mathbf{D}\mathbf{z}_k^i = \hat{\mathbf{D}}\hat{\mathbf{z}}_j^i + \hat{\mathbf{D}}\hat{\mathbf{z}}_k^i = \hat{\mathbf{D}}(\hat{\mathbf{z}}_j^i + \hat{\mathbf{z}}_k^i)$ . Since  $\mathbf{z}_{jk}^i$  is 1-block-sparse, this implies that  $\hat{\mathbf{z}}_j^i + \hat{\mathbf{z}}_k^i$  should also be 1-block-sparse. Therefore  $\pi(i, j) = \pi(i, k)$ , that is,  $\pi : \{1, \dots, L\} \rightarrow \{1, \dots, L\}$ .

$$\mathbf{D}(\mathbf{e}_i^L \otimes \mathbf{e}_j^\alpha) = \hat{\mathbf{D}}(\mathbf{e}_{\pi(i)}^L \otimes \mathbf{I}_\alpha)\boldsymbol{\lambda}_{ij}. \quad (5)$$

Let us now prove that  $\mathbf{\Lambda}_i = [\boldsymbol{\lambda}_{i1}, \dots, \boldsymbol{\lambda}_{i\alpha}]$  is invertible. Let  $\mathbf{Z}^i = [\mathbf{z}_1^i, \dots, \mathbf{z}_\alpha^i]$  and  $\hat{\mathbf{Z}}^i = [\hat{\mathbf{z}}_1^i, \dots, \hat{\mathbf{z}}_\alpha^i]$ . From Equation 5, it follows that  $\mathbf{D}\mathbf{Z}^i = \mathbf{D}[\mathbf{z}_1^i, \dots, \mathbf{z}_\alpha^i] = \mathbf{D}[(\mathbf{e}_i^L \otimes \mathbf{e}_1^\alpha), \dots, (\mathbf{e}_i^L \otimes \mathbf{e}_\alpha^\alpha)] = \mathbf{D}(\mathbf{e}_i^L \otimes \mathbf{I}_\alpha)$ , and  $\mathbf{D}\mathbf{Z}^i = \hat{\mathbf{D}}\hat{\mathbf{Z}}^i = \hat{\mathbf{D}}(\mathbf{e}_{\pi(i)}^L \otimes \mathbf{I}_\alpha) [\boldsymbol{\lambda}_{i1}, \dots, \boldsymbol{\lambda}_{i\alpha}] = \hat{\mathbf{D}}(\mathbf{e}_{\pi(i)}^L \otimes \mathbf{I}_\alpha)\mathbf{\Lambda}_i$ . Therefore,

$$\mathbf{D}(\mathbf{e}_i^L \otimes \mathbf{I}_\alpha) = \hat{\mathbf{D}}(\mathbf{e}_{\pi(i)}^L \otimes \mathbf{I}_\alpha)\mathbf{\Lambda}_i. \quad (6)$$

Due to the fact that  $\mathbf{D}$  satisfies the block spark condition,  $\text{rank}(\mathbf{D}(\mathbf{e}_i^L \otimes \mathbf{I}_\alpha)) = \alpha$ . From Equation 6,  $\text{rank}(\hat{\mathbf{D}}(\mathbf{e}_{\pi(i)}^L \otimes \mathbf{I}_\alpha)\mathbf{\Lambda}_i) = \alpha$ . We know that  $\text{rank}(\mathbf{X}\mathbf{Y}) \leq \min(\text{rank}(\mathbf{X}), \text{rank}(\mathbf{Y}))$ , for any matrix  $\mathbf{X}, \mathbf{Y}$ . So  $\text{rank}(\mathbf{\Lambda}_i) \geq \alpha$ . As  $\mathbf{\Lambda}_i \in \mathbb{R}^{\alpha \times \alpha}$ ,  $\text{rank}(\mathbf{\Lambda}_i) = \alpha$ .

Now, let us show  $\pi$  is necessarily injective. Suppose  $\pi(i) = \pi(j)$ , with  $i \neq j$ , then from Equation 6,  $\mathbf{D}(\mathbf{e}_i^L \otimes \mathbf{I}_\alpha) = \hat{\mathbf{D}}(\mathbf{e}_{\pi(i)}^L \otimes \mathbf{I}_\alpha)\mathbf{\Lambda}_i = \hat{\mathbf{D}}(\mathbf{e}_{\pi(j)}^L \otimes \mathbf{I}_\alpha)\mathbf{\Lambda}_j\mathbf{\Lambda}_j^{-1}\mathbf{\Lambda}_i = \mathbf{D}(\mathbf{e}_j^L \otimes \mathbf{I}_\alpha)\mathbf{\Lambda}_j^{-1}\mathbf{\Lambda}_i$ . Since  $\mathbf{D}$  satisfies the block spark condition, which implies  $\mathbf{D}$  can never map two different 1-block-sparse vectors to the same measurement, this is possible only if  $i = j$ . Thus,  $\pi$  is injective.

Let  $\mathbf{P}_\pi$  and  $\mathbf{D}$  be generated by

$$\mathbf{P}_\pi = \begin{bmatrix} \mathbf{e}_{\pi(1)}^L & \cdots & \mathbf{e}_{\pi(K)}^L \end{bmatrix}, \mathbf{\Lambda} = \begin{bmatrix} \mathbf{\Lambda}_1 & \cdots & 0 \\ \vdots & \ddots & \vdots \\ 0 & \cdots & \mathbf{\Lambda}_L \end{bmatrix}. \quad (7)$$

Since  $\pi$  is injective,  $\mathbf{P}_\pi$  is a permutation matrix. Let us stack Equation 6 from left-to-right on both sides, and it follows that on left sides,

$$[\mathbf{D}(\mathbf{e}_1^L \otimes \mathbf{I}_\alpha), \dots, \mathbf{D}(\mathbf{e}_L^L \otimes \mathbf{I}_\alpha)] = \mathbf{D}, \quad (8)$$

and on right sides,

$$[\hat{\mathbf{D}}(\mathbf{e}_{\pi(1)}^L \otimes \mathbf{I}_\alpha)\mathbf{\Lambda}_1, \dots, \hat{\mathbf{D}}(\mathbf{e}_{\pi(L)}^L \otimes \mathbf{I}_\alpha)\mathbf{\Lambda}_L] = \hat{\mathbf{D}}(\mathbf{P}_\pi \otimes \mathbf{I}_\alpha)\mathbf{\Lambda}. \quad (9)$$

Hence, we proved Theorem 1 for the simple case, where  $K = 1$ .  $\square$

**Preparation:** We use the same notation reported in [2]: Denote  $[L]$  as the set  $\{1, \dots, L\}$  and  $\binom{[L]}{K}$  as the  $K$ -element subset of  $[L]$ . Moreover, let the dictionary  $\mathbf{D} = [\mathbf{D}_1, \dots, \mathbf{D}_L]$  with  $\mathbf{D}_i \in \mathbb{R}^{D \times \alpha}$ , and denote  $\text{span}\{\mathbf{D}_S\}$  as a subspace expanded by  $\mathbf{D}_i, i \in S$ .

To prove Theorem 1 in general situations, we offer a lemma at first.

**Lemma 1.** *Suppose that  $\mathbf{D}$  satisfies the block spark condition and*

$$\kappa : \binom{[L]}{K} \rightarrow \binom{[L]}{K} \quad (10)$$

*is a mapping with the following property: for all  $S \in \binom{[L]}{K}$ ,*

$$\text{span}\{\mathbf{D}_S\} = \text{span}\{\hat{\mathbf{D}}_{\kappa(S)}\}. \quad (11)$$

*Then, there exist a permutation matrix  $\mathbf{P}_\kappa \in \mathbb{R}^{L \times L}$  and an invertible block diagonal matrix  $\mathbf{\Lambda} \in \mathbb{R}^{M \times M}$  such that  $\mathbf{D} = \hat{\mathbf{D}}(\mathbf{P}_\kappa \otimes \mathbf{I}_\alpha)\mathbf{\Lambda}$ .*

*Proof.* Here we demonstrate, through induction, that if our  $K = 1$  case holds, therefore,  $K > 1$  case should also hold. First, let us show function  $\kappa$  is injective. Suppose

that  $S, S' \in \binom{[L]}{K}$  are different and  $\kappa(S) = \kappa(S')$  holds. Then by Equation 11,  $\text{span}\{\mathbf{D}_S\} = \text{span}\{\hat{\mathbf{D}}_{\kappa(S)}\} = \text{span}\{\hat{\mathbf{D}}_{\kappa(S')}\} = \text{span}\{\mathbf{D}_{S'}\}$ . As  $\mathbf{D}$  satisfies the block spark condition, every  $K + 1$  block columns of  $\mathbf{D}$  are linearly independent. From Lemma 2 (see below), it turns out that  $S = S'$ , which implies  $\kappa$  is injective.

Denote  $\eta = \kappa^{-1}$  as the inverse of  $\kappa$ . Fix  $S = \{i_1, \dots, i_{K-1}\} \in \binom{[L]}{K-1}$ , and set  $S_1 = S \cup \{p\}$  and  $S_2 = S \cup \{q\}$  for some fixed  $p, q \notin S$  with  $p \neq q$ . Since  $K < L, L - (K - 1) > 1$ , thus, it is always possible to find such  $p$  and  $q$ . From Equation 11, we obtain:

$$\text{span}\{\mathbf{D}_{\eta(S_1)}\} = \text{span}\{\hat{\mathbf{D}}_{S_1}\}, \quad (12)$$

$$\text{span}\{\mathbf{D}_{\eta(S_2)}\} = \text{span}\{\hat{\mathbf{D}}_{S_2}\}. \quad (13)$$

Let us intersect Equation 12 and Equation 13, and from Lemma 3 (see below) it follows that  $\text{span}\{\hat{\mathbf{D}}_{S_1}\} \cap \text{span}\{\hat{\mathbf{D}}_{S_2}\} = \text{span}\{\mathbf{D}_{\eta(S_1) \cap \eta(S_2)}\}$ . Since  $\text{span}\{\hat{\mathbf{D}}_S\} \subseteq \text{span}\{\hat{\mathbf{D}}_{S_1}\} \cap \text{span}\{\hat{\mathbf{D}}_{S_2}\}$ , it follows that  $\text{span}\{\hat{\mathbf{D}}_S\} \subseteq \text{span}\{\mathbf{D}_{\eta(S_1) \cap \eta(S_2)}\}$ . The number of the elements in  $\eta(S_1) \cap \eta(S_2)$  is  $K - 1$ , since  $\eta(p) \neq \eta(q)$ , with  $p \neq q$ , by injectivity of  $\eta$ . Moreover the number of the elements in  $S$  is also  $K - 1$ , which implies that

$$\text{span}\{\hat{\mathbf{D}}_S\} = \text{span}\{\mathbf{D}_{\eta(S_1) \cap \eta(S_2)}\}. \quad (14)$$

The association  $S \rightarrow \eta(S_1) \cap \eta(S_2)$  from Equation 14 defines a function  $\sigma : \binom{[L]}{K-1} \rightarrow \binom{[L]}{K-1}$ , with property that  $\text{span}\{\hat{\mathbf{D}}_S\} = \text{span}\{\mathbf{D}_{\sigma(S)}\}$ .

Finally, let's show that  $\sigma$  is injective. Suppose  $S, S' \in \binom{[L]}{K-1}$ , and  $\sigma(S) = \sigma(S')$ , it follows that  $\text{span}\{\hat{\mathbf{D}}_S\} = \text{span}\{\mathbf{D}_{\sigma(S)}\} = \text{span}\{\mathbf{D}_{\sigma(S')}\} = \text{span}\{\hat{\mathbf{D}}_{S'}\}$ . As every  $K$  block columns of  $\mathbf{D}$  are linear independent, and  $\kappa$  is injective, every  $K$  block columns of  $\hat{\mathbf{D}}$  are also linear independent. From Lemma 2, it follows that  $S = S'$ , which implies  $\sigma$  is injective. Hence, let  $\xi = \sigma^{-1}$ , with properties: for all  $S \in \binom{[L]}{K-1}$ ,  $\text{span}\{\mathbf{D}_S\} = \text{span}\{\hat{\mathbf{D}}_{\xi(S)}\}$ .  $\square$

**Lemma 2.** *If any set of  $K + 1$  block columns of matrix  $\mathbf{D} = [\mathbf{D}_1, \dots, \mathbf{D}_L]$  are linear independent, then for  $S, S' \in \binom{[L]}{K}$ ,*

$$\text{span}\{\mathbf{D}_S\} = \text{span}\{\mathbf{D}_{S'}\} \Rightarrow S = S'. \quad (15)$$

*Proof.* Suppose that  $S \neq S' \in \binom{[L]}{K}$  satisfying  $\text{span}\{\mathbf{D}_S\} = \text{span}\{\mathbf{D}_{S'}\}$ . Then without loss of generality, there is an  $i \in S$  with  $i \notin S'$ , but atoms  $\mathbf{D}_i \in \text{span}\{\mathbf{D}_{S'}\}$ , which implies that the  $K + 1$  block columns indexed by  $S' \cup \{i\}$  are not linear independent, a contradiction to the assumption.  $\square$

**Lemma 3.** *If matrix  $\mathbf{D}$  satisfies the block spark condition, then for  $S, S' \in \binom{[L]}{K}$ ,*

$$\text{span}\{\mathbf{D}_{S \cap S'}\} = \text{span}\{\mathbf{D}_S\} \cap \text{span}\{\mathbf{D}_{S'}\}. \quad (16)$$

*Proof.* The inclusion “ $\subseteq$ ” is trivial, so let us prove “ $\supseteq$ ”. Suppose a block vector  $\mathbf{x} \in \text{span}\{\mathbf{D}_{\mathcal{S}}\} \cap \text{span}\{\mathbf{D}_{\mathcal{S}'}\}$ . Express  $\mathbf{x}$  as a linear combination of  $K$  atoms of  $\mathbf{D}$  indexed by  $\mathcal{S}$  and, separately, as a combination of  $K$  atoms of  $\mathbf{D}$  indexed by  $\mathcal{S}'$ . By the block spark condition, these linear combinations must be identical. In particular,  $\mathbf{x}$  was expressed as a linear combination of atoms of  $\mathbf{D}$  indexed by  $\mathcal{S} \cap \mathcal{S}'$ , and thus is in  $\text{span}\{\mathbf{D}_{\mathcal{S} \cap \mathcal{S}'}\}$   $\square$

**Proof of Theorem 1 when  $\beta = 1$ :** First, we produce a set of  $N = K \binom{M/\alpha}{K}^2$  vectors  $\mathbf{s}_i \in \mathbb{R}^{\alpha K}$  in general linear position (*i.e.* any subset of  $K$  of them are linearly independent). One possible strategy is to produce a “Vandermonde” matrix [3]. Next, we form  $K$ -block-sparse vectors  $\mathbf{z}_1, \dots, \mathbf{z}_N$  by taking  $\mathbf{s}_i$  for the support value of  $\mathbf{z}_i$  where each possible support set is represented  $K \binom{M/\alpha}{K}$  times. We claim that these  $\mathbf{z}_i$  always guarantee the uniqueness of BSDL.

*Proof.* Suppose there exists an alternate dictionary  $\hat{\mathbf{D}}$  and a set of  $K$ -block-sparse vectors  $\hat{\mathbf{z}}_1, \dots, \hat{\mathbf{z}}_N$  such that  $\mathbf{D}\mathbf{z}_i = \mathbf{x}_i = \hat{\mathbf{D}}\hat{\mathbf{z}}_i$ . As there are  $K \binom{M/\alpha}{K}$   $\mathbf{x}_i$  for each support indexed by  $\mathcal{S}$ , the “pigeon-hole principle”<sup>1</sup> implies that there are at least  $K$  vectors  $\hat{\mathbf{z}}_{i_1}, \dots, \hat{\mathbf{z}}_{i_K}$  using the same support  $\mathcal{S}'$ . Thus,  $\text{span}\{\mathbf{x}_{i_1}, \dots, \mathbf{x}_{i_K}\} \subseteq \text{span}\{\hat{\mathbf{D}}_{\mathcal{S}'}\}$ . By the general linear position and the block spark condition,  $\text{span}\{\mathbf{x}_{i_1}, \dots, \mathbf{x}_{i_K}\} = \text{span}\{\mathbf{D}_{\mathcal{S}}\}$ . Therefore  $\text{span}\{\mathbf{D}_{\mathcal{S}}\} \subseteq \text{span}\{\hat{\mathbf{D}}_{\mathcal{S}'}\}$ . As the dimension of  $\text{span}\{\hat{\mathbf{D}}_{\mathcal{S}'}\}$  is less and equal to  $K$ ,  $\text{span}\{\mathbf{D}_{\mathcal{S}}\} = \text{span}\{\hat{\mathbf{D}}_{\mathcal{S}'}\}$ .

By Lemma 1, Theorem 1 is proved.  $\square$

**Discussion:** A lower  $N = (K + 1) \binom{M}{K}$  is offered by Hillar *et al.*’s probabilistic theorems in [2] saying that if  $K + 1$   $K$ -sparse vector  $\mathbf{z}_i$  are randomly drawn from each support set, and  $\mathbf{D}$  satisfies the spark condition, then  $\mathbf{X}$  has a unique SDL with probability one. We hypothesize that a lower  $N = (K + 1) \binom{M/\alpha}{K}$  is also enough for the uniqueness of BSDL to hold with probability one, which will be a focus of future work.

## References

- [1] R. A. Brualdi. *Introductory combinatorics*. New York, 1992. 3
- [2] C. Hillar and F. T. Sommer. When can dictionary learning uniquely recover sparse data from subsamples? In *IEEE Transactions on Information Theory*, 2015. 2, 3
- [3] L. R. Turner. Inverse of the vandermonde matrix with applications. 1966. 3

<sup>1</sup>The pigeon-hole principle states that if  $n$  items are put into  $m$  containers, with  $n > m$ , then at least one container must contain more than one item [1].
